# Supplementary material for: Variation in antiviral immunity and inflammation pathways precedes HIV-1 infection in a high-risk African cohort
Source: JCI journal article supplement (doi:10.1172/jci195172), 2026-02-12
Supplement: sd1 [file 1]

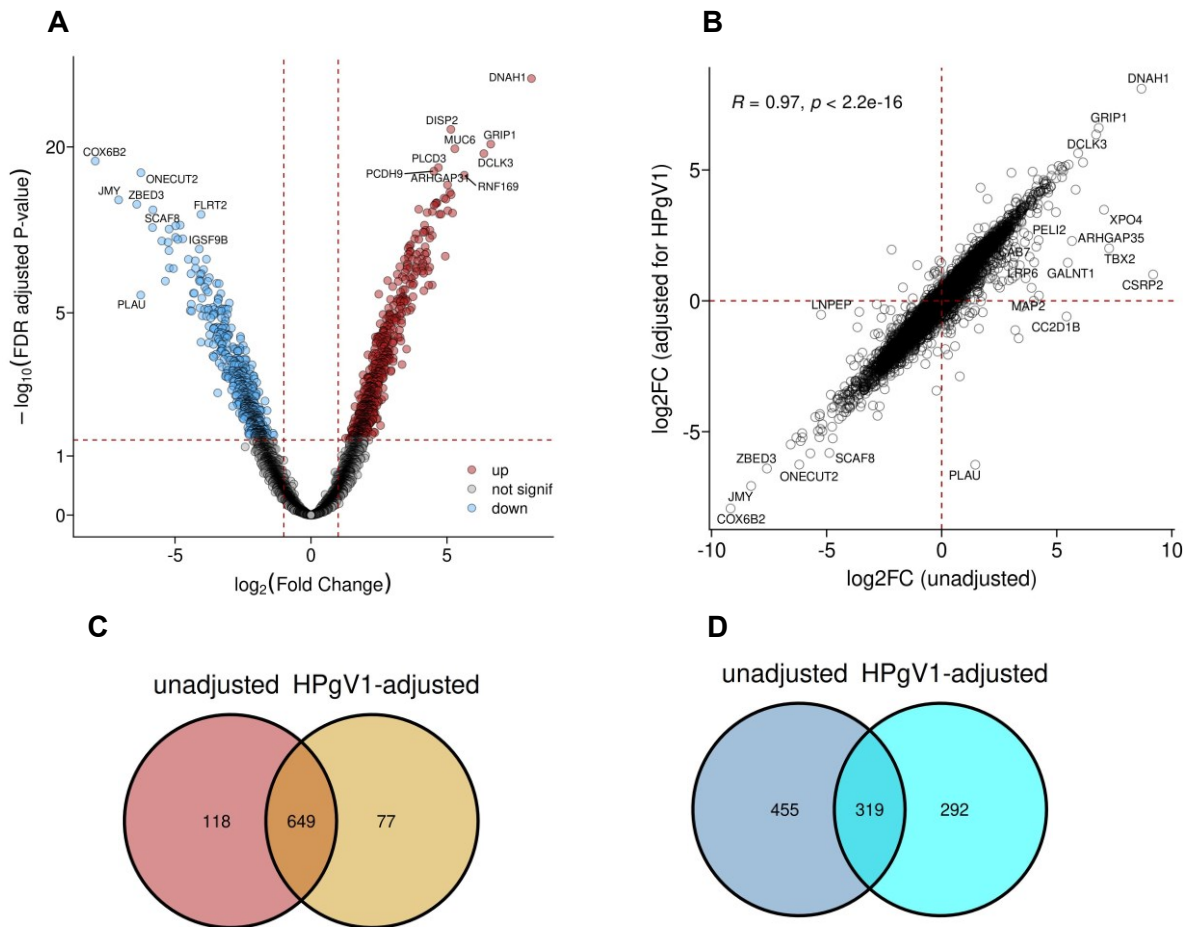

**Figure S1: HPgV1 has minimal impact on transcriptome alterations between HIV1-cases and controls three months prior to infection.** A) Volcano plot showing HPgV1-adjusted transcriptional alterations between cases and negative controls, three-months prior to HIV-1 infection. B) Scatterplot showing a high correlation between the log2FCs before and after adjusting for HPgV1. C) and D) Venndiagram showing overlap between upregulated (C) and downregulated (D) genes before and after adjusting for HPgV1.

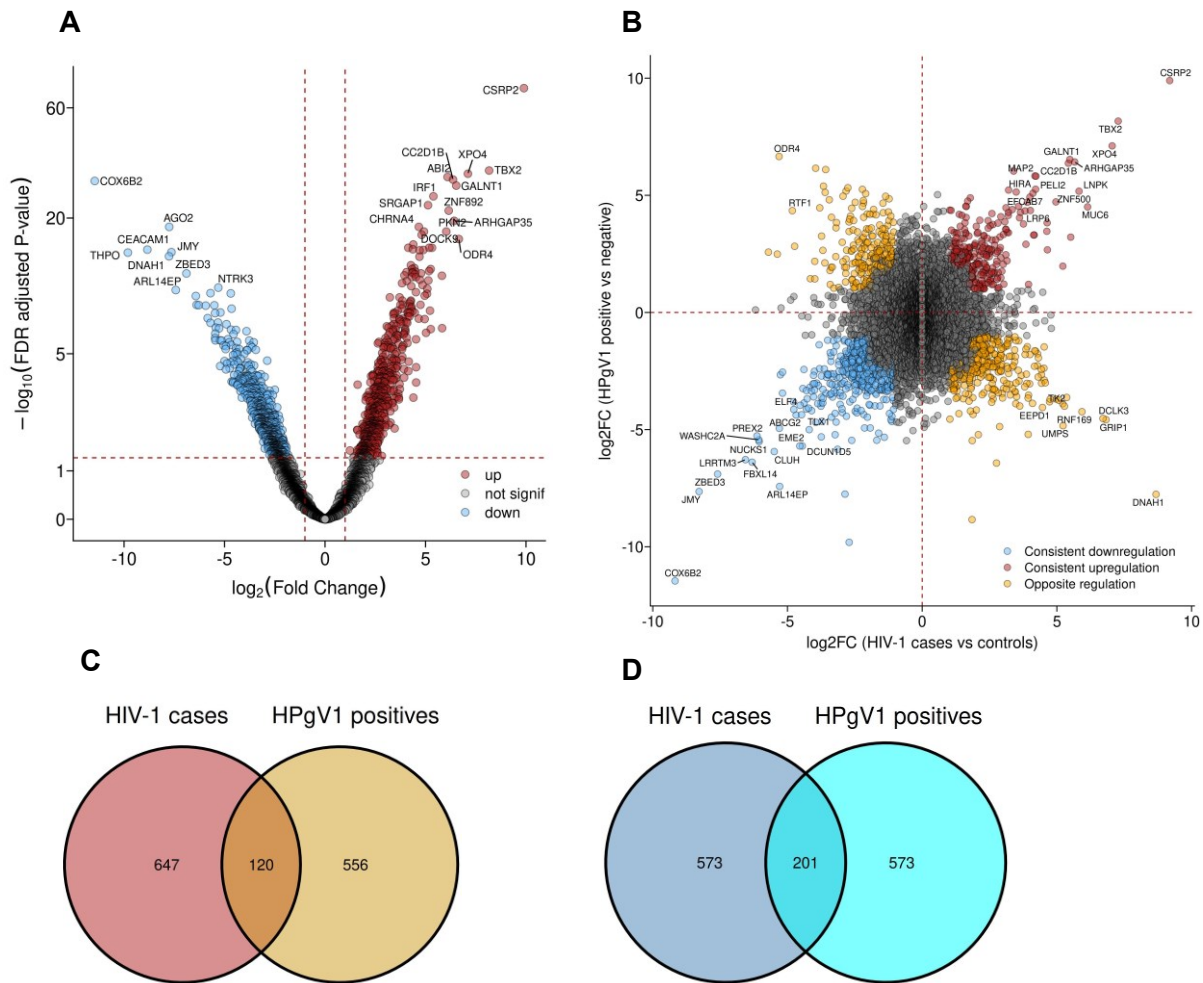

**Figure S2: Modest consistency in differential expression changes between HIV-1 case-control comparison and HPgV1 positive-negative comparison.** A) Volcano plot showing transcriptional alterations between HPgV1 positive and negative samples, three-months prior to HIV-1 infection. B) Scatterplot comparing the HIV-1 case-control  $\log_2FC$  and HPgV1 positive-negative  $\log_2FC$ . C) and D) Venn diagram showing overlap between upregulated (C) and downregulated (D) in both comparisons.

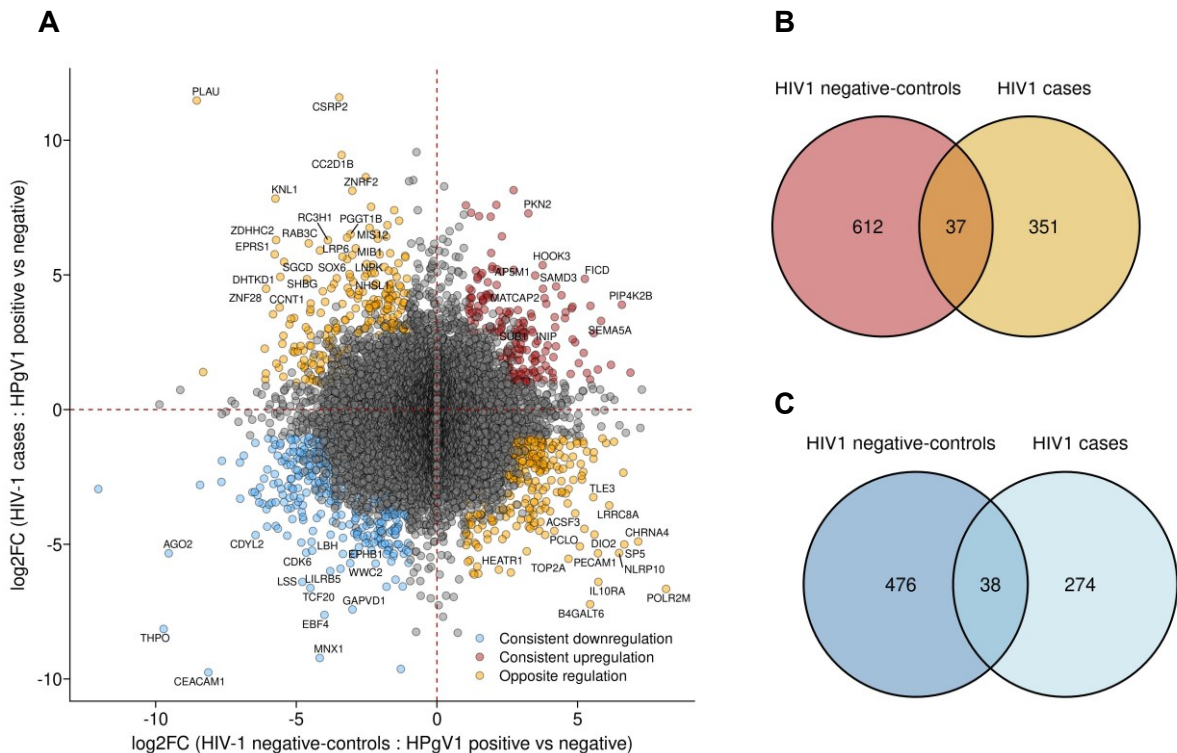

**Figure S3: Little concordance between HPgV1 associated transcriptional patterns in HIV-1 cases and negative-controls.** A) Scatterplot comparing HPgV1 associated gene expression alterations between HIV-cases and negative controls, . B) and C) Venndiagram showing overlap between upregulated (B) and downregulated (C) in both comparisons.



**A1: S1\_before\_RNase**

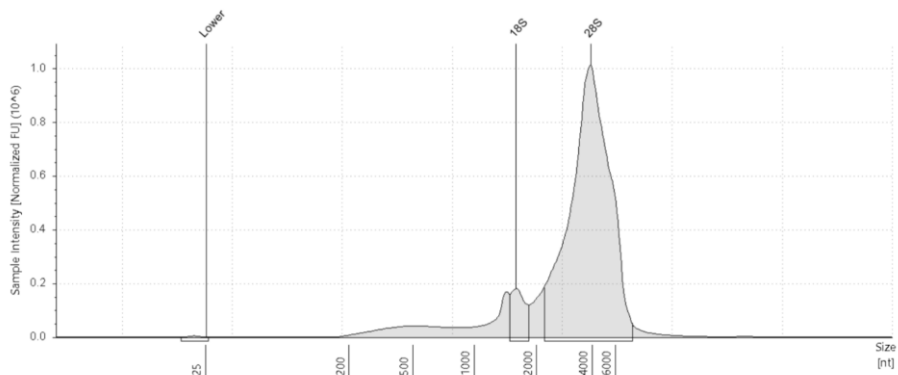

**D1: S1\_after\_RNase**

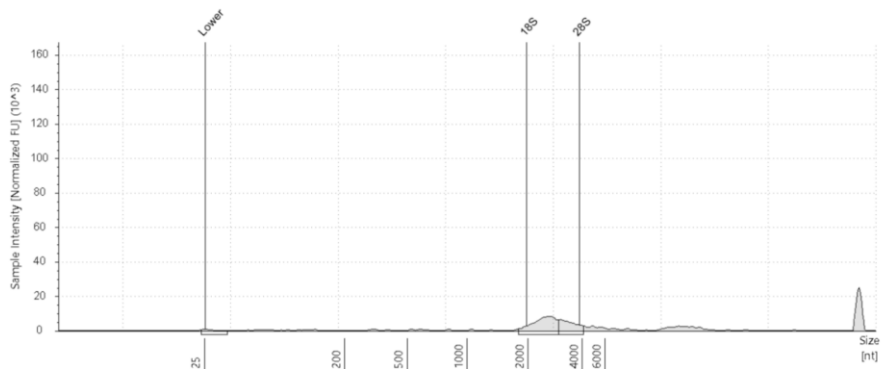

**Figure S5: Degradation of RNA by RNase A.** We isolated cellular RNA and treated it with the same RNase A we used to treat our pellets. The enzyme was working as expected.

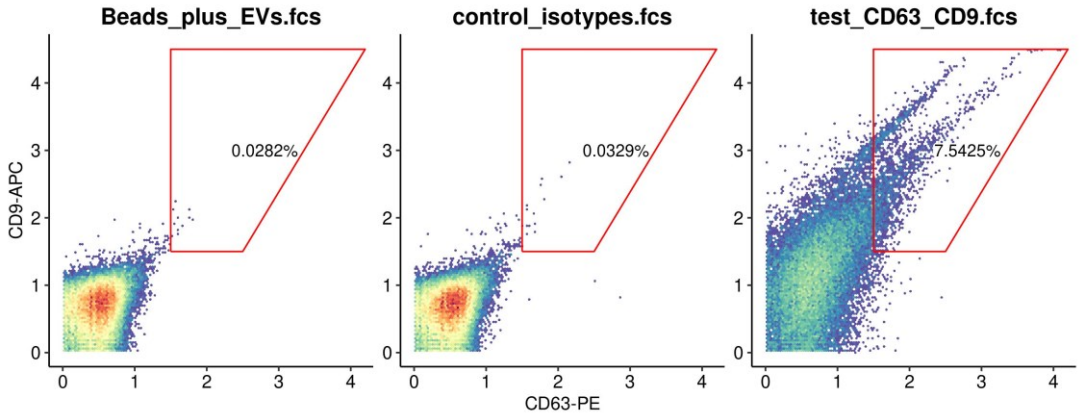

**Figure S6: Plasma-derived ultracentrifugation pellets contain extracellular vesicles.** We used bead-assisted flow cytometry to probe for EVs markers (CD63 and CD9) in the pellets obtained after high-speed centrifugation of processed plasma (150,000xg for 2 h). Left=beads were incubated with pellets alone without antibodies, middle=beads incubated with pellets followed by isotype control antibodies and right=beads incubated with pellets followed by anti-CD63 and anti-CD9.

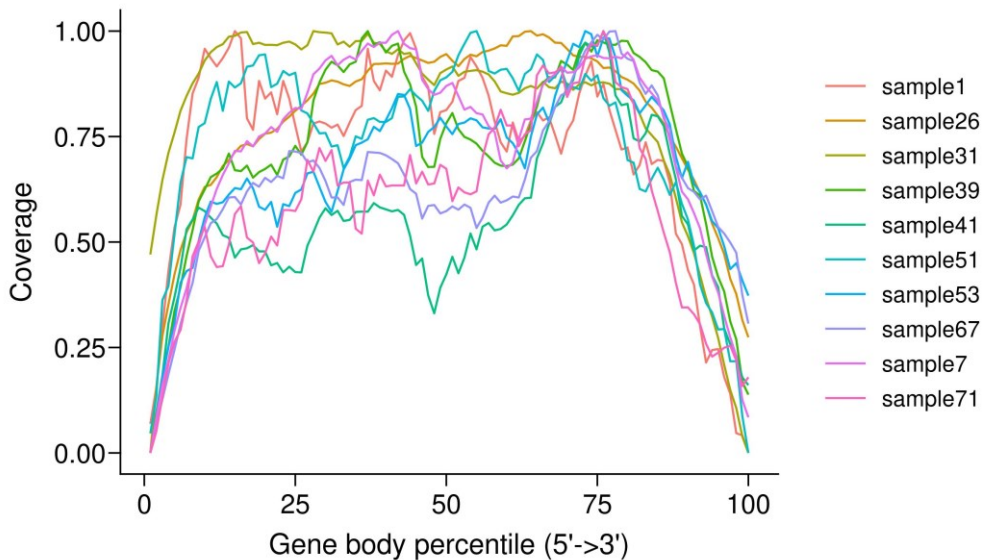

**Figure S7: Read Coverage was globally uniform across the genes' length.** We randomly selected 10 samples and calculated the gene body percentile coverage. There is no significant bias in read coverage.
